# Supplementary material
Source: Springer Nature journal article supplement (https://www.springermedizin.de/resource/supplementary/12943_2013_1231_MOESM2_ESM.pdf/9553104)

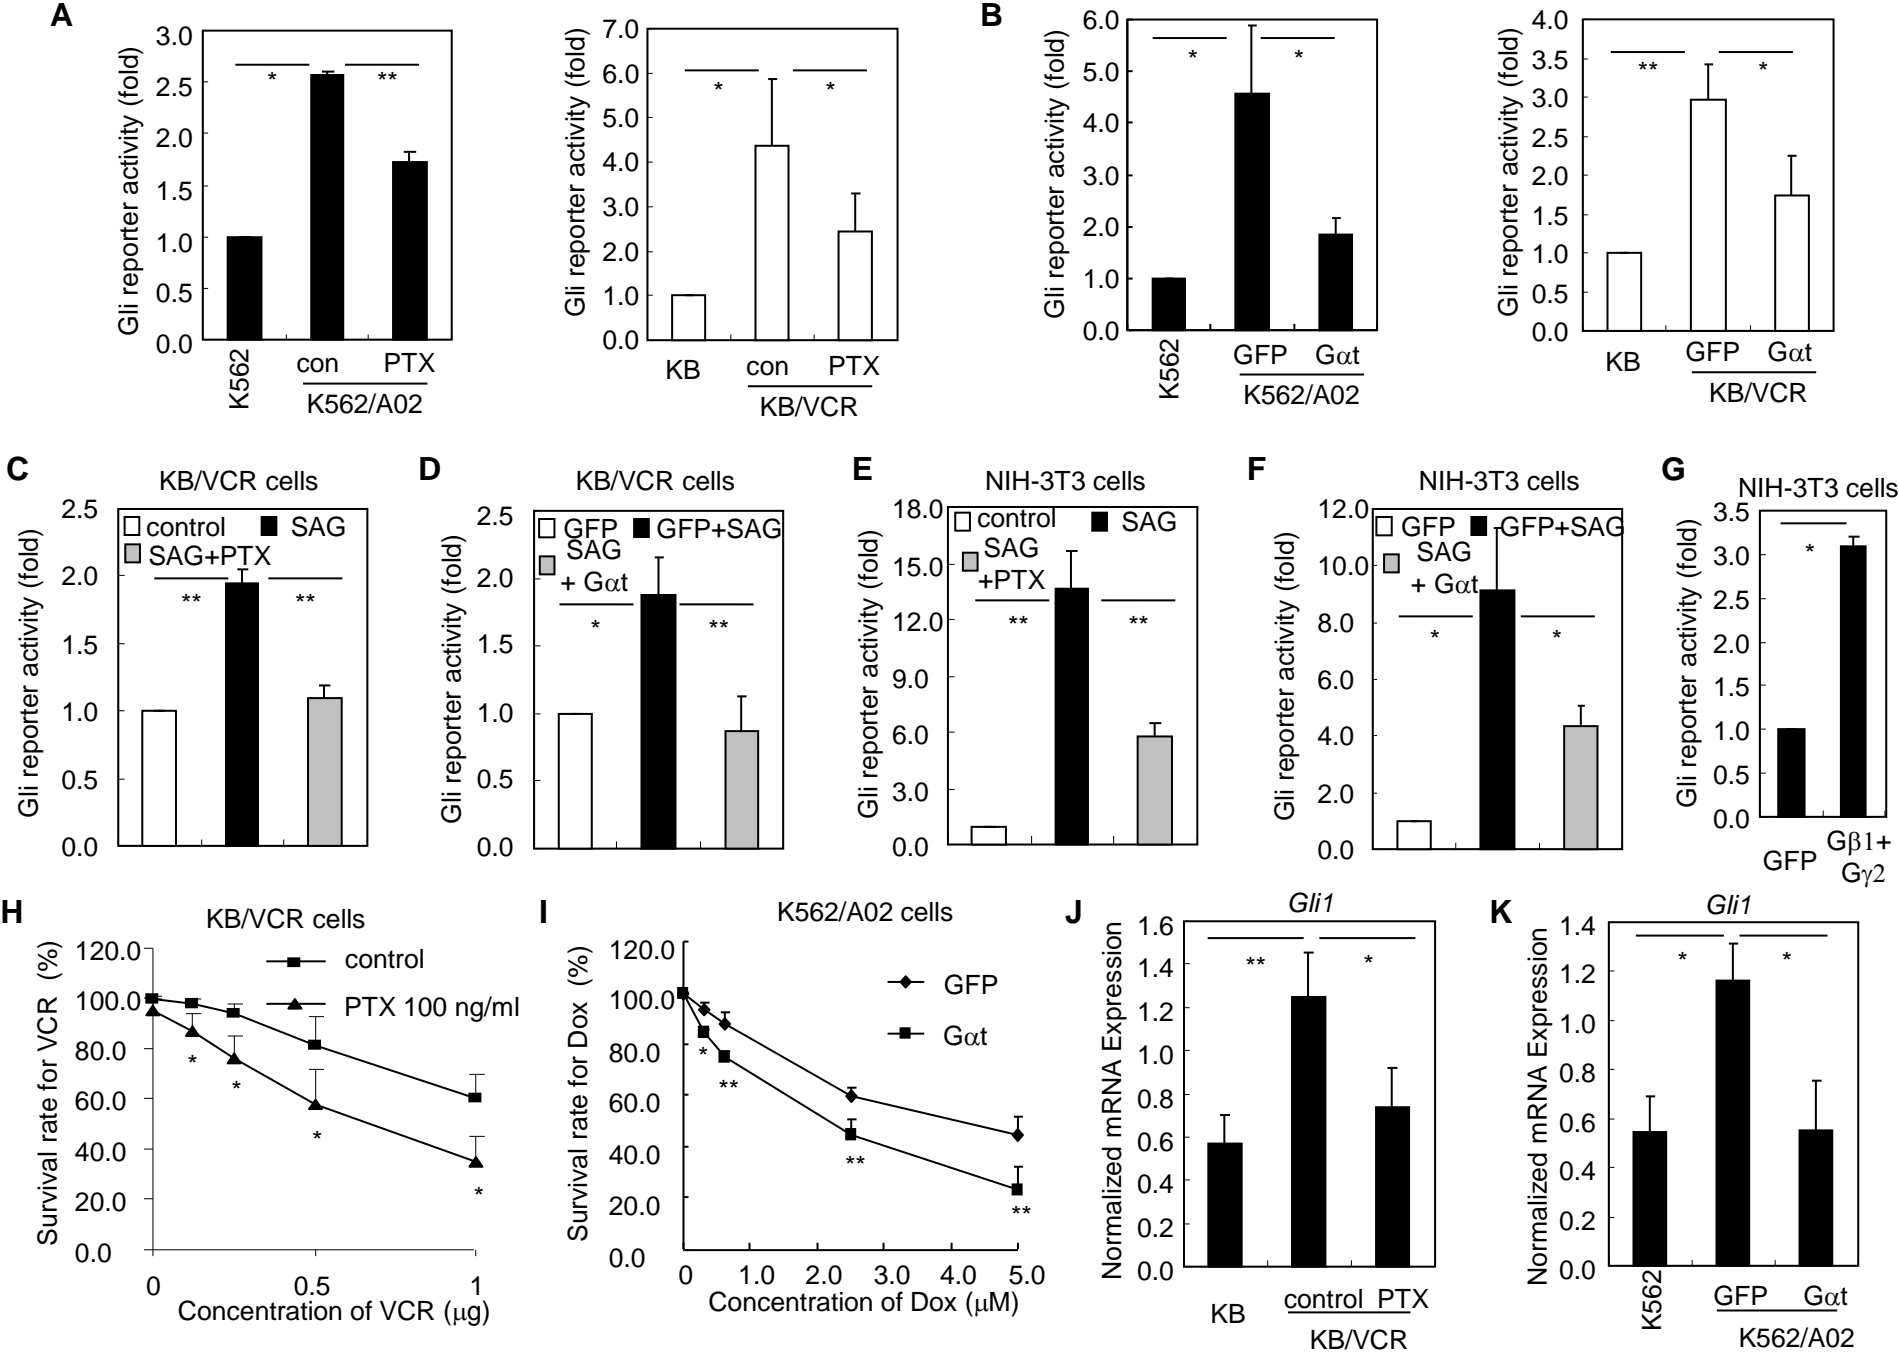

Supplement: MOESM2 [file 9553104]
